# Supplementary material for: Lycopene attenuates di(2-ethylhexyl) phthalate-induced mitophagy in spleen by regulating the sirtuin3-mediated pathway
Source: Royal Society of Chemistry journal article supplement (doi:10.1039/d0fo03277h), 2021-01-01
Supplement: d0fo03277h1.pdf [file d0fo03277h1.pdf]

## ***Supplemental Materials***

Table S1 The dosage regimen and experimental groups.

| <b>Groups</b> | <b>Dosage regimen</b>                          |
|---------------|------------------------------------------------|
| Con group     | distilled water                                |
| Vcon group    | corn oil                                       |
| Lyc group     | 5 mg/kg BW/day Lyc                             |
| D5 group      | 500 mg/kg BW/day DEHP                          |
| D10 group     | 1000 mg/kg BW/day DEHP                         |
| DL5 group     | 500 mg/kg BW/day DEHP<br>+ 5 mg/kg BW/day Lyc  |
| DL10 group    | 1000 mg/kg BW/day DEHP<br>+ 5 mg/kg BW/day Lyc |

Table S2 The primer pairs used for qRT-PCR analyses.

| Gene Name      | Primers                                                  | Gene Bank number |
|----------------|----------------------------------------------------------|------------------|
| PGC-1 $\alpha$ | F: ATACCGCAAAGAGCACGAGAA<br>R: CTCAAGAGCAGCGAAAGCGTCACA  | NM_008904.2      |
| NRF1           | F: TATGGCGGAAGTAATGAAAGACG<br>R: CAACGTAAGCTCTGCCTTGTT   | NM_001164226     |
| TFAM           | F: AACACCCAGATGCAAAACTTTCA<br>R: GACTTGGAGTTAGCTGCTCTTT  | NM_009360.4      |
| MFN1           | F: CCTACTGCTCCTTCTAACCCA<br>R: AGGGACGCCAATCCTGTGA       | NM_024200.4      |
| MFN2           | F: CTGGGGACCGGATCTTCTTC<br>R: CTGCCTCTCGAAATTCTGAAACT    | NM_133201.3      |
| OPA1           | F: TGGAAAATGGTTCGAGAGTCAG<br>R: CATTCCGTCTCTAGGTTAAAGCG  | NM_133752.3      |
| Drp1           | F: ACCGGGAATGACCAAAGTACC<br>R: TGGGATTACTGATGAACCGAAGA   | NM_152816.3      |
| PINK           | F: GGCTTCCGTCTGGAGGATTAT<br>R: AACCTGCCGAGATATTCCACA     | NM_026880.2      |
| Parkin         | F: GGTCTACAGACAGGGCAATA<br>R: CTGGCCTTTCCTCACACCAC       | AB019558.1       |
| SIRT1          | F: TGATTGGCACCGATCCTCG<br>R: CCACAGCGTCATATCATCCAG       | NM_019812        |
| SIRT2          | F: GCGGGTATCCCTGACTTCC<br>R: CGTGTCTATGTTCTGCGTGTAG      | NM_022432        |
| SIRT3          | F: GGCTCTATACACAGAACATCGAC<br>R: TAGCTGTTACAAAGGTCCCGT   | NM_022433        |
| SIRT4          | F: GATTGACTTTCAGGCCGACAA<br>R: GCGGCACAAATAACCCCGA       | NM_001167691     |
| SIRT5          | F: CCAGTTGTGTTGTAGACGAAAGC<br>R: TTCCGAAAGTCTGCCATATTTGA | NM_178848        |
| SIRT6          | F: CTGAGAGACACCATTCTGGACT<br>R: GGTTGCAGGTTGACAATGACC    | NM_181586        |
| SIRT7          | F: GCACTTGGTTGTCTACACGG<br>R: TGTCCATACTCCATTAGGACCC     | NM_153056        |
| GADPH          | F: CGTGCCGCCTGGAGAAACCTG<br>R: AGAGTGGGAGTTGCTGTTGAAGTCG | XM_017321385.2   |
| $\beta$ -actin | F: GTGACGTTGACATCCGTAAAGA<br>R: GCCGGACTCATCGTACTCC      | XM_030254057.1   |

Table S3-1 Total variance explained of PCA

| Component | Initial Eigenvalues |               |                     | Extraction Sums of Squared Loadings |               |                     |
|-----------|---------------------|---------------|---------------------|-------------------------------------|---------------|---------------------|
|           | Total               | % of Variance | % of Variance Total | Total                               | % of Variance | % of Variance Total |
| 1         | 13.029              | 81.433        | 81.433              | 13.029                              | 81.433        | 81.433              |
| 2         | 2.368               | 14.801        | 96.234              | 2.368                               | 14.801        | 96.234              |
| 3         | .293                | 1.832         | 98.065              |                                     |               |                     |
| 4         | .196                | 1.228         | 99.293              |                                     |               |                     |
| 5         | .069                | .429          | 99.722              |                                     |               |                     |
| 6         | .044                | .278          | 100.000             |                                     |               |                     |
| 7         | 5.463E-016          | 3.414E-015    | 100.000             |                                     |               |                     |
| 8         | 4.738E-016          | 2.961E-015    | 100.000             |                                     |               |                     |
| 9         | 3.907E-016          | 2.442E-015    | 100.000             |                                     |               |                     |
| 10        | 1.136E-016          | 7.099E-016    | 100.000             |                                     |               |                     |
| 11        | 2.803E-017          | 1.752E-016    | 100.000             |                                     |               |                     |
| 12        | -7.085E-017         | -4.428E-016   | 100.000             |                                     |               |                     |
| 13        | -1.811E-016         | -1.132E-015   | 100.000             |                                     |               |                     |
| 14        | -2.713E-016         | -1.696E-015   | 100.000             |                                     |               |                     |
| 15        | -3.031E-016         | -1.894E-015   | 100.000             |                                     |               |                     |
| 16        | -4.319E-016         | -2.699E-015   | 100.000             |                                     |               |                     |

Extraction Method: Principal Component Analysis (PCA).

Table S3-2 The component matrix of related factors.

Component matrix<sup>a</sup>

|        | Component |       |
|--------|-----------|-------|
|        | 1         | 2     |
| SIRT1  | .943      | .134  |
| SIRT2  | .932      | -.070 |
| SIRT3  | .991      | .084  |
| SIRT4  | -.975     | -.086 |
| SIRT5  | -.858     | .454  |
| SIRT6  | -.948     | -.175 |
| SIRT7  | .898      | -.422 |
| PGC1a  | .568      | .817  |
| OPA1   | .088      | .985  |
| MFN2   | .967      | -.197 |
| MFN1   | .984      | .177  |
| NRF1   | .897      | -.358 |
| Drp1   | .973      | -.190 |
| TFAM   | .994      | .088  |
| Parkin | .989      | .105  |
| PINK   | .974      | .160  |

Extraction Method: Principal Component Analysis (PCA).

a. Two components have been extracted.



|        |                           |        |         |        |         |       |         |       |       |       |       |         |       |       |         |         |         |
|--------|---------------------------|--------|---------|--------|---------|-------|---------|-------|-------|-------|-------|---------|-------|-------|---------|---------|---------|
| OPA1   | Pearson correlation       | .056   | -.438   | -.124  | .082    | .543  | -.064   | -.629 | .882  | 1     | -.358 | .026    | -.665 | -.426 | -.103   | -.100   | .034    |
|        | Significant ( Bilateral ) | .964   | .711    | .921   | .948    | .635  | .959    | .567  | .312  |       | .767  | .983    | .537  | .720  | .934    | .936    | .979    |
|        | N                         | 3      | 3       | 3      | 3       | 3     | 3       | 3     | 3     | 3     | 3     | 3       | 3     | 3     | 3       | 3       | 3       |
| MFN2   | Pearson correlation       | .912   | .996    | .971   | -.960   | -.978 | -.909   | .951  | .124  | -.358 | 1     | .924    | .935  | .997* | .966    | .965    | .921    |
|        | Significant ( Bilateral ) | .269   | .056    | .153   | .181    | .132  | .274    | .200  | .921  | .767  |       | .250    | .230  | .047  | .167    | .169    | .254    |
|        | N                         | 3      | 3       | 3      | 3       | 3     | 3       | 3     | 3     | 3     | 3     | 3       | 3     | 3     | 3       | 3       | 3       |
| MFN1   | Pearson correlation       | 1.000* | .887    | .989   | -.994   | -.825 | -.999*  | .761  | .494  | .026  | .924  | 1       | .729  | .893  | .992    | .992    | 1.000** |
|        | Significant ( Bilateral ) | .019   | .305    | .096   | .069    | .382  | .024    | .449  | .671  | .983  | .250  |         | .480  | .297  | .083    | .081    | .005    |
|        | N                         | 3      | 3       | 3      | 3       | 3     | 3       | 3     | 3     | 3     | 3     | 3       | 3     | 3     | 3       | 3       | 3       |
| NRF1   | Pearson correlation       | .709   | .963    | .824   | -.799   | -.988 | -.703   | .999* | -.235 | -.665 | .935  | .729    | 1     | .959  | .812    | .810    | .724    |
|        | Significant ( Bilateral ) | .499   | .174    | .384   | .411    | .098  | .504    | .030  | .849  | .537  | .230  | .480    |       | .183  | .397    | .399    | .484    |
|        | N                         | 3      | 3       | 3      | 3       | 3     | 3       | 3     | 3     | 3     | 3     | 3       | 3     | 3     | 3       | 3       | 3       |
| Drp1   | Pearson correlation       | .880   | 1.000** | .951   | -.937   | -.991 | -.876   | .971  | .050  | -.426 | .997* | .893    | .959  | 1     | .944    | .943    | .890    |
|        | Significant ( Bilateral ) | .316   | .009    | .201   | .228    | .085  | .321    | .153  | .968  | .720  | .047  | .297    | .183  |       | .214    | .216    | .301    |
|        | N                         | 3      | 3       | 3      | 3       | 3     | 3       | 3     | 3     | 3     | 3     | 3       | 3     | 3     | 3       | 3       | 3       |
| TFAM   | Pearson correlation       | .987   | .939    | 1.000* | -1.000* | -.891 | -.986   | .838  | .377  | -.103 | .966  | .992    | .812  | .944  | 1       | 1.000** | .991    |
|        | Significant ( Bilateral ) | .101   | .223    | .014   | .013    | .299  | .106    | .367  | .754  | .934  | .167  | .083    | .397  | .214  |         | .002    | .087    |
|        | N                         | 3      | 3       | 3      | 3       | 3     | 3       | 3     | 3     | 3     | 3     | 3       | 3     | 3     | 3       | 3       | 3       |
| Parkin | Pearson correlation       | .988   | .938    | 1.000* | -1.000* | -.890 | -.987   | .837  | .380  | -.100 | .965  | .992    | .810  | .943  | 1.000** | 1       | .991    |
|        | Significant ( Bilateral ) | .100   | .225    | .016   | .012    | .301  | .105    | .369  | .752  | .936  | .169  | .081    | .399  | .216  | .002    |         | .085    |
|        | N                         | 3      | 3       | 3      | 3       | 3     | 3       | 3     | 3     | 3     | 3     | 3       | 3     | 3     | 3       | 3       | 3       |
| PINK   | Pearson correlation       | 1.000* | .884    | .987   | -.993   | -.821 | -1.000* | .756  | .500  | .034  | .921  | 1.000** | .724  | .890  | .991    | .991    | 1       |
|        | Significant ( Bilateral ) | .014   | .310    | .101   | .074    | .387  | .019    | .454  | .667  | .979  | .254  | .005    | .484  | .301  | .087    | .085    |         |
|        | N                         | 3      | 3       | 3      | 3       | 3     | 3       | 3     | 3     | 3     | 3     | 3       | 3     | 3     | 3       | 3       | 3       |

\*\* . At the 0.01 level (Bilateral) significant correlation.

\* . At the 0.05 level (Bilateral) significant correlation.



|        |                         |       |       |       |       |         |       |       |       |      |       |       |      |       |       |       |       |
|--------|-------------------------|-------|-------|-------|-------|---------|-------|-------|-------|------|-------|-------|------|-------|-------|-------|-------|
| OPA1   | Pearson correlation     | .168  | .166  | .634  | .048  | -.098   | .544  | .452  | -.395 | 1    | .025  | .572  | .396 | .595  | .158  | .737  | .234  |
|        | Significant (Bilateral) | .832  | .834  | .366  | .952  | .902    | .456  | .548  | .605  |      | .975  | .428  | .604 | .405  | .842  | .263  | .766  |
|        | N                       | 4     | 4     | 4     | 4     | 4       | 4     | 4     | 4     | 4    | 4     | 4     | 4    | 4     | 4     | 4     | 4     |
| MFN2   | Pearson correlation     | .564  | .803  | .721  | -.421 | .318    | .704  | .902  | -.734 | .025 | 1     | .042  | .460 | -.208 | -.287 | .658  | -.618 |
|        | Significant (Bilateral) | .436  | .197  | .279  | .579  | .682    | .296  | .098  | .266  | .975 |       | .958  | .540 | .792  | .713  | .342  | .382  |
|        | N                       | 4     | 4     | 4     | 4     | 4       | 4     | 4     | 4     | 4    | 4     | 4     | 4    | 4     | 4     | 4     | 4     |
| MFN1   | Pearson correlation     | .777  | -.356 | .642  | -.726 | -.820   | -.061 | .320  | -.710 | .572 | .042  | 1     | .895 | .967* | .856  | .620  | .727  |
|        | Significant (Bilateral) | .223  | .644  | .358  | .274  | .180    | .939  | .680  | .290  | .428 | .958  |       | .105 | .033  | .144  | .380  | .273  |
|        | N                       | 4     | 4     | 4     | 4     | 4       | 4     | 4     | 4     | 4    | 4     | 4     | 4    | 4     | 4     | 4     | 4     |
| NRF1   | Pearson correlation     | .968* | -.038 | .822  | -.896 | -.649   | .143  | .615  | -.935 | .396 | .460  | .895  | 1    | .753  | .687  | .755  | .409  |
|        | Significant (Bilateral) | .032  | .962  | .178  | .104  | .351    | .857  | .385  | .065  | .604 | .540  | .105  |      | .247  | .313  | .245  | .591  |
|        | N                       | 4     | 4     | 4     | 4     | 4       | 4     | 4     | 4     | 4    | 4     | 4     | 4    | 4     | 4     | 4     | 4     |
| Drp1   | Pearson correlation     | .601  | -.526 | .464  | -.576 | -.858   | -.199 | .105  | -.510 | .595 | -.208 | .967* | .753 | 1     | .888  | .466  | .854  |
|        | Significant (Bilateral) | .399  | .474  | .536  | .424  | .142    | .801  | .895  | .490  | .405 | .792  | .033  | .247 |       | .112  | .534  | .146  |
|        | N                       | 4     | 4     | 4     | 4     | 4       | 4     | 4     | 4     | 4    | 4     | 4     | 4    | 4     | 4     | 4     | 4     |
| TFAM   | Pearson correlation     | .629  | -.752 | .193  | -.723 | -.998** | -.565 | -.146 | -.385 | .158 | -.287 | .856  | .687 | .888  | 1     | .138  | .922  |
|        | Significant (Bilateral) | .371  | .248  | .807  | .277  | .002    | .435  | .854  | .615  | .842 | .713  | .144  | .313 | .112  |       | .862  | .078  |
|        | N                       | 4     | 4     | 4     | 4     | 4       | 4     | 4     | 4     | 4    | 4     | 4     | 4    | 4     | 4     | 4     | 4     |
| Parkin | Pearson correlation     | .660  | .505  | .988* | -.434 | -.075   | .737  | .912  | -.879 | .737 | .658  | .620  | .755 | .466  | .138  | 1     | -.062 |
|        | Significant (Bilateral) | .340  | .495  | .012  | .566  | .925    | .263  | .088  | .121  | .263 | .342  | .380  | .245 | .534  | .862  |       | .938  |
|        | N                       | 4     | 4     | 4     | 4     | 4       | 4     | 4     | 4     | 4    | 4     | 4     | 4    | 4     | 4     | 4     | 4     |
| PINK   | Pearson correlation     | .295  | -.891 | -.056 | -.400 | -.925   | -.659 | -.417 | -.062 | .234 | -.618 | .727  | .409 | .854  | .922  | -.062 | 1     |
|        | Significant (Bilateral) | .705  | .109  | .944  | .600  | .075    | .341  | .583  | .938  | .766 | .382  | .273  | .591 | .146  | .078  | .938  |       |
|        | N                       | 4     | 4     | 4     | 4     | 4       | 4     | 4     | 4     | 4    | 4     | 4     | 4    | 4     | 4     | 4     | 4     |

\*\* . At the 0.01 level (Bilateral) significant correlation.

\* . At the 0.05 level (Bilateral) significant correlation.
